# Supplementary material for: How a single mutation alters the protein structure: a simulation investigation on protein tyrosine phosphatase SHP2
Source: Royal Society of Chemistry journal article supplement (doi:10.1039/d2ra07472a), 2023-01-01
Supplement: d2ra07472a1.pdf [file d2ra07472a1.pdf]

## Supporting Information

### **How a single mutation alters the protein structure: a simulation investigation on protein tyrosine phosphatase SHP2**

Yingnan Hou<sup>1,2</sup>, Xiaoli Lu<sup>1,2</sup>, Ziyao Xu<sup>3</sup>, Jiarun Qu<sup>3</sup>, and Jing Huang<sup>1,2 \*</sup>

<sup>1</sup> Westlake AI Therapeutics Lab, Westlake Laboratory of Life Sciences and Biomedicine, 18 Shilongshan Road, Hangzhou 310024, Zhejiang, China.

<sup>2</sup> Key Laboratory of Structural Biology of Zhejiang Province, School of Life Sciences, Westlake University, 18 Shilongshan Road, Hangzhou 310024, Zhejiang, China.

<sup>3</sup> BioMap, 2 Kexueyuan South Road, Beijing 100000, China

\*Corresponding author: Jing Huang, [huangjing@westlake.edu.cn](mailto:huangjing@westlake.edu.cn)

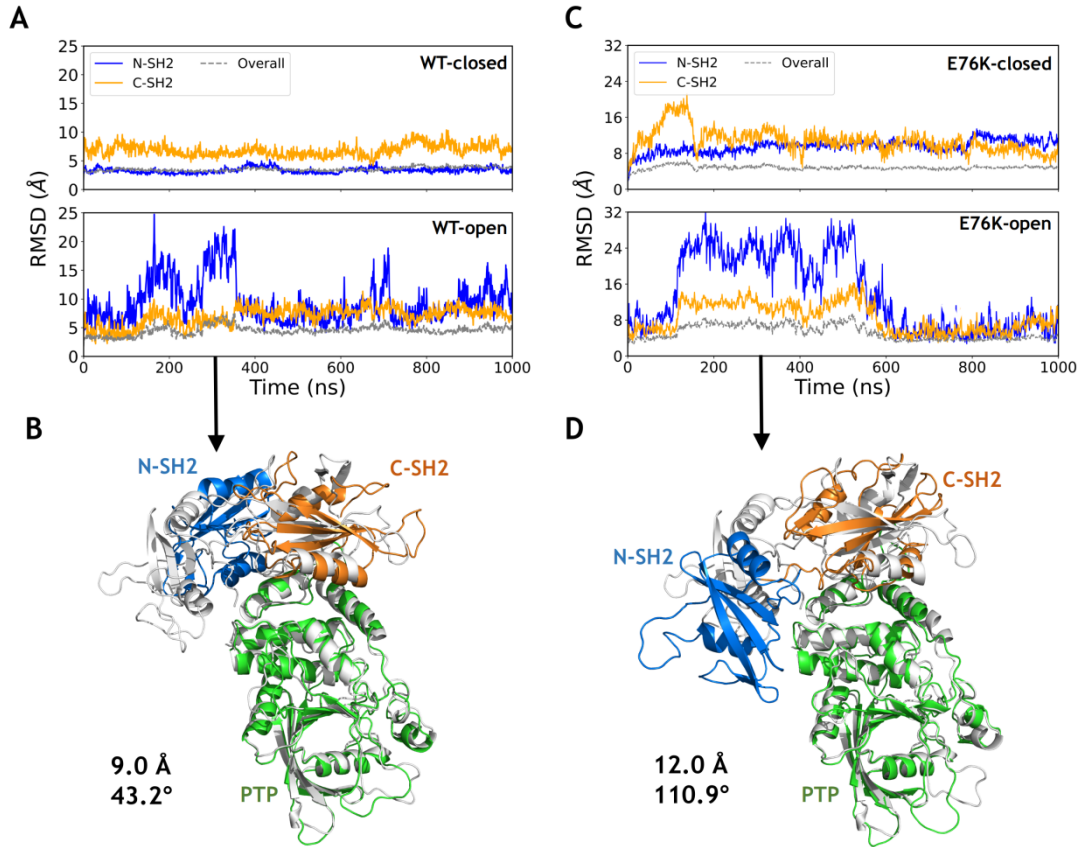

Fig. S1. The RMSDs analysis for the four MD simulations and two representative conformations. (A,C) The time evolution of RMSDs of backbone atoms in the N-SH2 (blue) and C-SH2 (orange) domains with alignment to the PTP domain in the first frame (solid lines). Also shown is the time evolution of RMSDs of backbone atoms in overall structure with alignment to itself in the first frame (dashed gray lines). (B, D) The representative conformations with large RMSDs in the N-SH2 and C-SH2 domains with alignment to the PTP in the first frames, from the MD trajectories in the WT-open (B) and E76K-open (D) systems at ~345 ns. The RMSDs of backbone atoms with alignment to the crystal structure in the open state (light color) and the  $Dih_{NCP}$  are labeled.

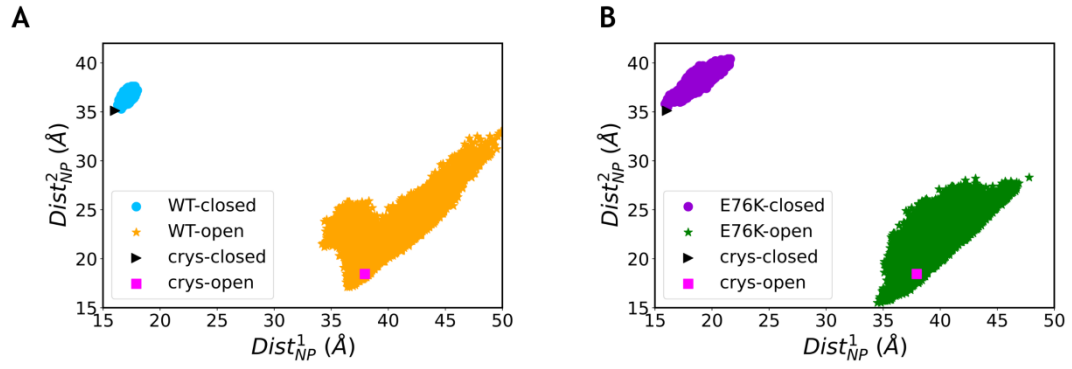

Fig. S2. The conventional MD trajectories in the closed and open states can be well distinguished with the two distance CVs ( $Dist^1_{NP}$  and  $Dist^2_{NP}$ ). The X-ray structures in the closed (cys-closed) and open (cys-open) states are marked.

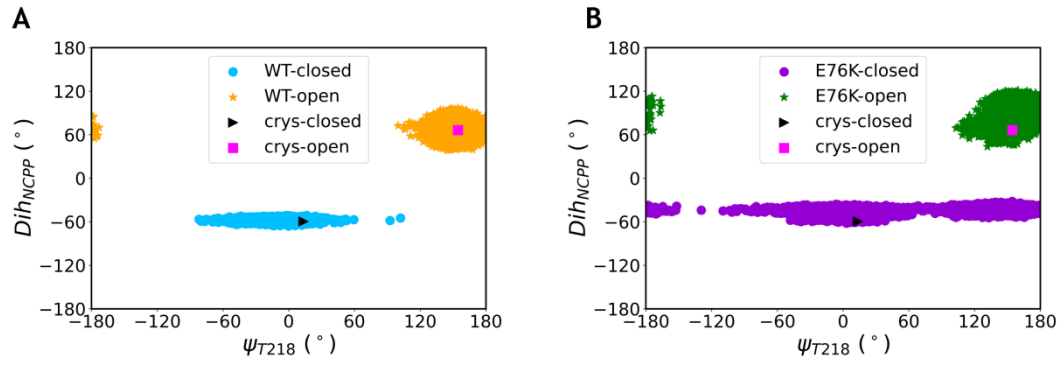

Fig. S3. The conventional MD trajectories in the closed and open states can be well distinguished with the two dihedral CVs ( $\psi_{T218}$  and  $Dih_{NCP}$ ). The X-ray structures in the closed (crys-closed) and open (crys-open) states are marked.

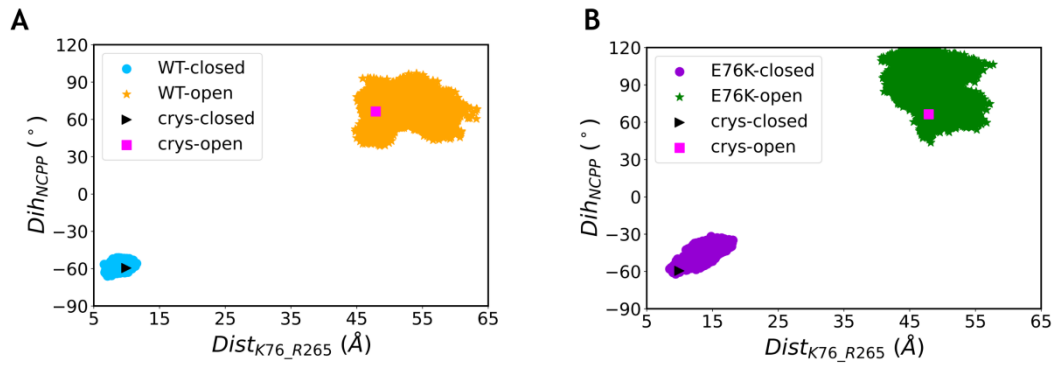

Fig. S4. The conventional MD trajectories in the closed and open states can be well distinguished with the distance  $Dist_{K76\_S265}$  and dihedral  $Dih_{N_{CPP}}$ . The X-ray structures in the closed (cys-closed) and open (cys-open) states are marked.

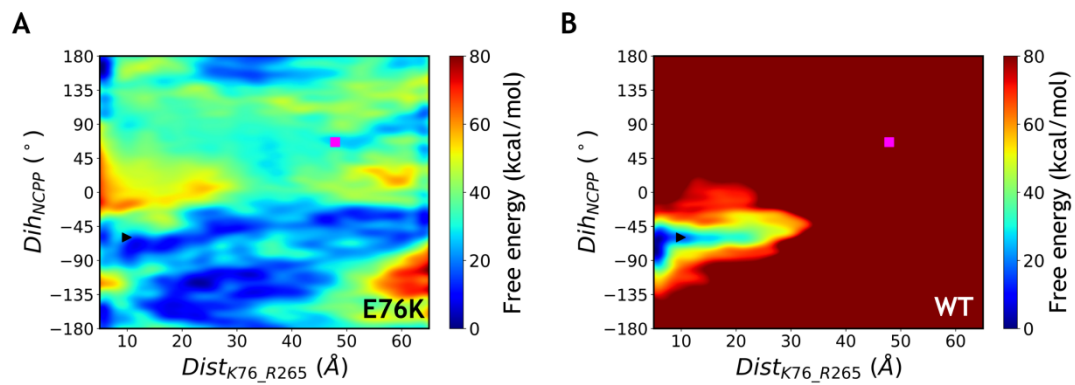

Fig. S5. Free energy landscapes projected on the distance and dihedral CVs for the E76K and the WT systems. The initial closed state is marked with a black right triangle and the target open state is marked with a magenta square.

Table S1. Overall simulations in this work. SHP2-WT: the wild type SHP2; SHP2-E76K: the E76K mutated SHP2. cMD: conventional molecular dynamics simulation; MetaD: Metadynamics simulation; CV: collective variable.

| ID | Protein   | MD type | Initial conformation                                        | MD Time (ns) |
|----|-----------|---------|-------------------------------------------------------------|--------------|
| 1  | SHP2-WT   | cMD     | 2SHP.pdb                                                    | 1000         |
| 2  | SHP2-WT   | cMD     | 6CRF.pdb                                                    | 1000         |
| 3  | SHP2-E76K | cMD     | 2SHP.pdb                                                    | 1000         |
| 4  | SHP2-E76K | cMD     | 6CRF.pdb                                                    | 1000         |
| 5  | SHP2-E76K | MetaD   | After 100ns cMD from simulation 3, distance CV              | 100          |
| 6  | SHP2-E76K | MetaD   | After 100ns cMD from simulation 3, dihedral CV              | 100          |
| 7  | SHP2-E76K | MetaD   | After 100ns cMD from simulation 3, distance and dihedral CV | ~74.8        |
| 8  | SHP2-WT   | MetaD   | After 100ns cMD from simulation 1, distance CV              | 100          |
| 9  | SHP2-WT   | MetaD   | After 100ns cMD from simulation 1, dihedral CV              | ~33.7        |
| 10 | SHP2-WT   | MetaD   | After 100ns cMD from simulation 1, distance and dihedral CV | ~9.1         |
| 11 | SHP2-E76K | cMD     | The conformation closest to 6CRF.pdb from simulation 5      | 100          |
| 12 | SHP2-E76K | cMD     | The conformation closest to 6CRF.pdb from simulation 6      | 100          |
| 13 | SHP2-E76K | cMD     | The conformation closest to 6CRF.pdb from simulation 7      | 100          |

Table S2. Setting for the Metadynamics simulations. Simulation IDs are consistent with that in Table S1. H: HEIGHT, BF: BIASFACTOR, MIN: GRID\_MIN, MAX: GRID\_MAX, BIN: GRID\_BIN, UPP: UPPER\_WALLS, LOW: LOW\_WALLS. Units for length and energy are nm and kJ/mol. Torsions (dihedral angles) are in radian. NOPBC was used for every atom.

| ID | CV1               | CV2           | SIGMA   | H  | PACE | BF  | TEMP | MIN         | MAX       | BIN     | UPP | LOW | KAPPA |
|----|-------------------|---------------|---------|----|------|-----|------|-------------|-----------|---------|-----|-----|-------|
| 5  | $Dist_{NP}^1$     | $Dist_{NP}^2$ | 0.2,0.2 | 10 | 2000 | 100 | 298  | 0,0         | 8,8       | 500,500 | 5,5 | 1,1 | 10000 |
| 6  | $\psi_{T218}$     | $Dih_{NCP}$   | 0.1,0.1 | 10 | 2000 | 100 | 298  | $-\pi,-\pi$ | $\pi,\pi$ | 500,500 | /   | /   | /     |
| 7  | $Dist_{K76,S265}$ | $Dih_{NCP}$   | 0.2,0.1 | 10 | 2000 | 100 | 298  | 0,- $\pi$   | 10, $\pi$ | 500,500 | 6.5 | 0.5 | 10000 |
| 8  | $Dist_{NP}^1$     | $Dist_{NP}^2$ | 0.2,0.2 | 10 | 2000 | 100 | 298  | 0,0         | 8,8       | 500,500 | 5,5 | 1,1 | 10000 |
| 9  | $\psi_{T218}$     | $Dih_{NCP}$   | 0.1,0.1 | 10 | 2000 | 100 | 298  | $-\pi,-\pi$ | $\pi,\pi$ | 500,500 | /   | /   | /     |
| 10 | $Dist_{K76,S265}$ | $Dih_{NCP}$   | 0.2,0.1 | 10 | 2000 | 100 | 298  | 0,- $\pi$   | 10, $\pi$ | 500,500 | 6.5 | 0.5 | 10000 |
